# Supplementary material for: Green and efficient piezocatalytic hydrogen production achieved by modifying SrBi4Ti4O15 with CdSe
Source: Royal Society of Chemistry journal article supplement (doi:10.1039/d3tc04723g), 2024-01-01
Supplement: d3tc04723g1.pdf [file d3tc04723g1.pdf]

# 1 Supporting Information

## 2 Green and Efficient Piezocatalytic Hydrogen Production Achieved by 3 Modifying SrBi<sub>4</sub>Ti<sub>4</sub>O<sub>15</sub> with CdSe

4

5 *Tiancheng Hou*<sup>a,#</sup>, *Longbin Chen*<sup>a,#</sup>, *Yaodong Yang*<sup>a\*</sup>, *Jialong Wang*<sup>a</sup>,  
6 *Tianzi Yang*<sup>b</sup>, *Wei-Feng Rao*<sup>a\*\*</sup>

7

8 a Tiancheng Hou, Longbin Chen, Jialong Wang, Prof. Yaodong Yang,  
9 Prof. Weifeng Rao.

10 Faculty of Mechanical Engineering (Shandong Institute of Mechanical  
11 Design and Research), Qilu University of Technology (Shandong  
12 Academy of Sciences), Jinan, 250353, China

13 b Tianzi Yang

14 Frontier Institute of Science and Technology, Xi'an Jiaotong University,  
15 Xi'an 710049, China

16 # These authors' contributions are equal.

17 \*Author to whom correspondence should be addressed.

18 YANG Yaodong, Email: [yaodongy@qlu.edu.cn](mailto:yaodongy@qlu.edu.cn)

19 RAO Weifeng, Email: [wfrao@qlu.edu.cn](mailto:wfrao@qlu.edu.cn)

## 20 **1. Experimental**

### 21 **1.1 Synthesis methods**

22 The CdSe QDs were synthesized by imitating previous reported work<sup>[1]</sup>. In  
23 a typical routine utilizing a three-neck flask, in order to prepare the Se  
24 precursor, Na<sub>2</sub>SO<sub>3</sub> (0.03 mol) and selenium powder (5.0 mmol) were added  
25 into 100 mL deionized water and refluxed under a nitrogen atmosphere at  
26 80 °C for 6 h. After that, CdAc·2H<sub>2</sub>O (4 mmol) was dissolved in 50 mL of  
27 deionized water and then 100 mL Se precursor was added dropwise into  
28 the mixture at 500 μL/min using a peristaltic pump during reflux and  
29 insulation at 80 °C for 6 h. The crimson precipitates were centrifuged and  
30 washed with ethanol and deionized water repeatedly to remove the residual  
31 reactants, and dried at 60 °C in a vacuum oven, labeled as CS.

32

### 33 **2.XPS-VB calculation**

34 The small binding energy range of VB<sub>-XPS</sub><sup>[2]</sup> is used to calculate its valence  
35 band. It is reported that the work function of the sample and the contact  
36 potential difference ( $\Delta V$ ) have the following relationship:  $\Delta V = \Phi - \phi$  ( $\Phi$   
37 and  $\phi$  are the work functions of the material and the XPS analyzer,  
38 respectively). So  $E_{VB, NHE} = \phi - 4.44 \text{ eV} + E_{VB, XPS}$  ( $\phi$  is the work function of  
39 XPS analyzer as 4.44, where 4.44 eV is the energy difference from Fermi  
40 energy level to valence band relative to the standard hydrogen electrode at  
41 pH = 7,  $E_{VB, NHE}$  is the position of energy band under the standard hydrogen

42 electrode, and  $E_{VB, XPS}$  is the position of the intersection of slope and X-  
43 axis).

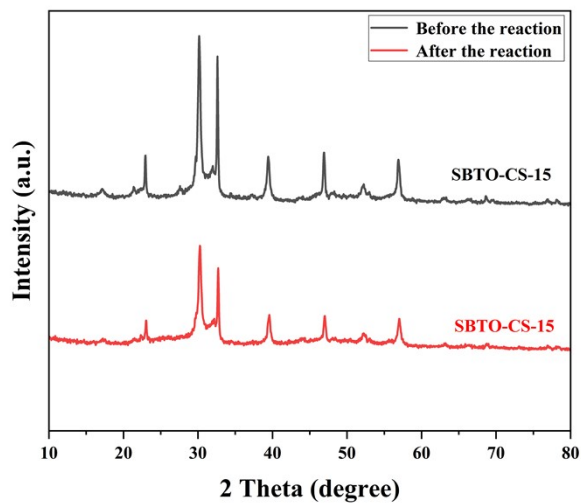

44

45 Fig. S1 XRD patterns of SBTO-CS-15 before and after reaction (reaction  
46 time is 3h).

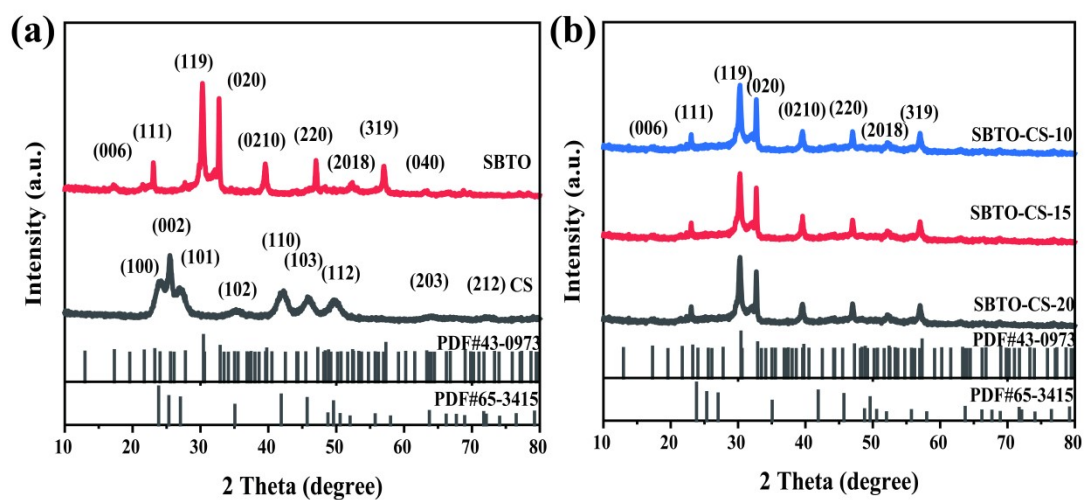

47

48 Fig. S2 (a) XRD patterns of pure SBTO, CS samples. (b) XRD patterns of  
49 SBTO-CS-10, 15, 20 samples.

50

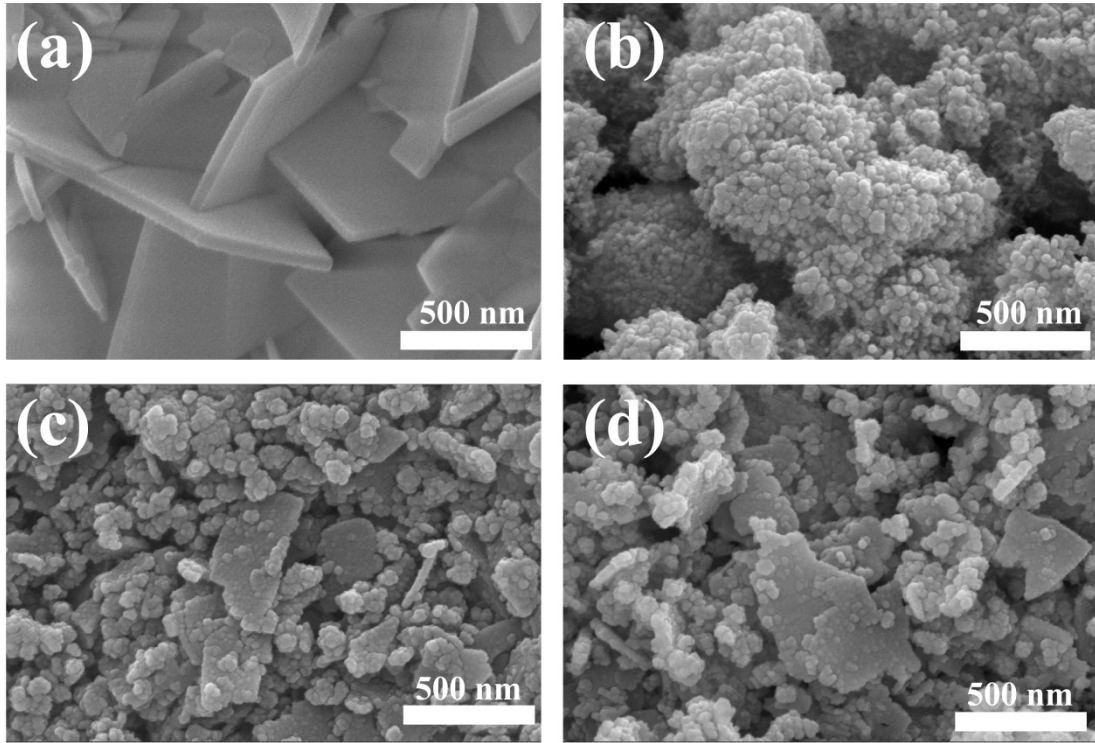

51

52 Fig S3. SEM images of (a) pure SBTO and (b) CS. (c-d) SEM images of  
 53 SBTO-CS-15 (at different regions).

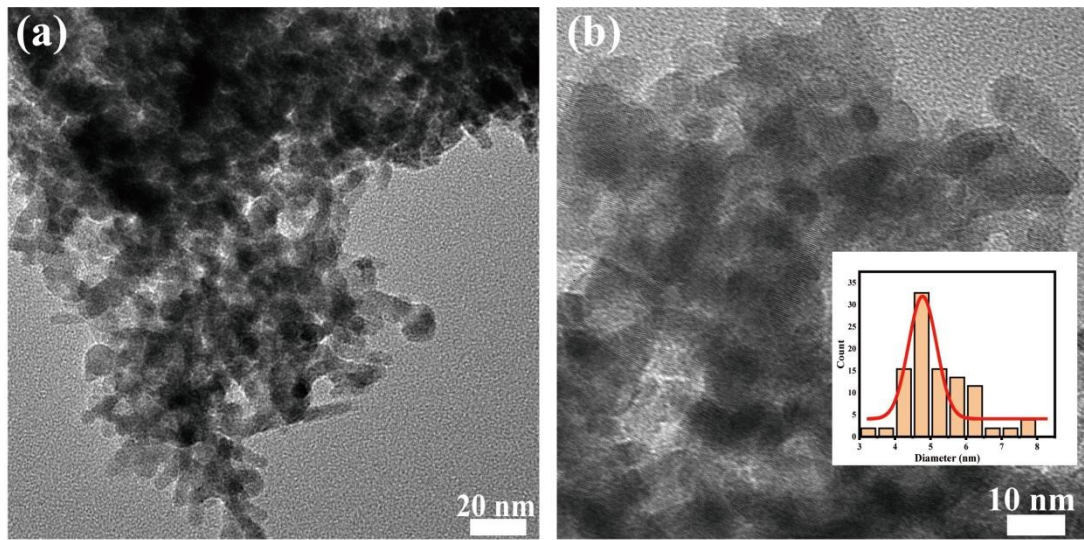

54

55 Fig. S4 (a-b) TEM images of CS QDs. (b) a higher magnification image of  
 56 CS and the insert shows the particles size distribution.

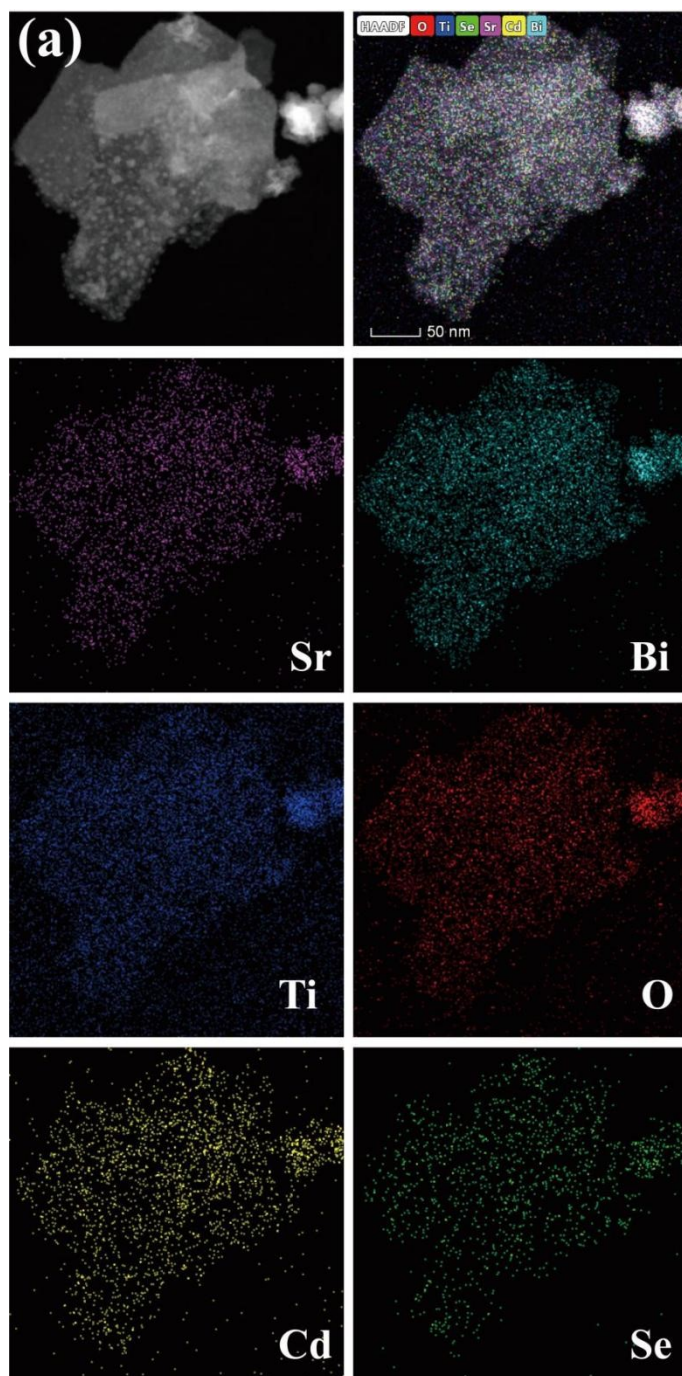

57

58 Fig. S5 EDS-mapping data of SBTO-CS-15 (Scanning for Sr, Bi, Ti, O,

59 Cd, Se elements.)

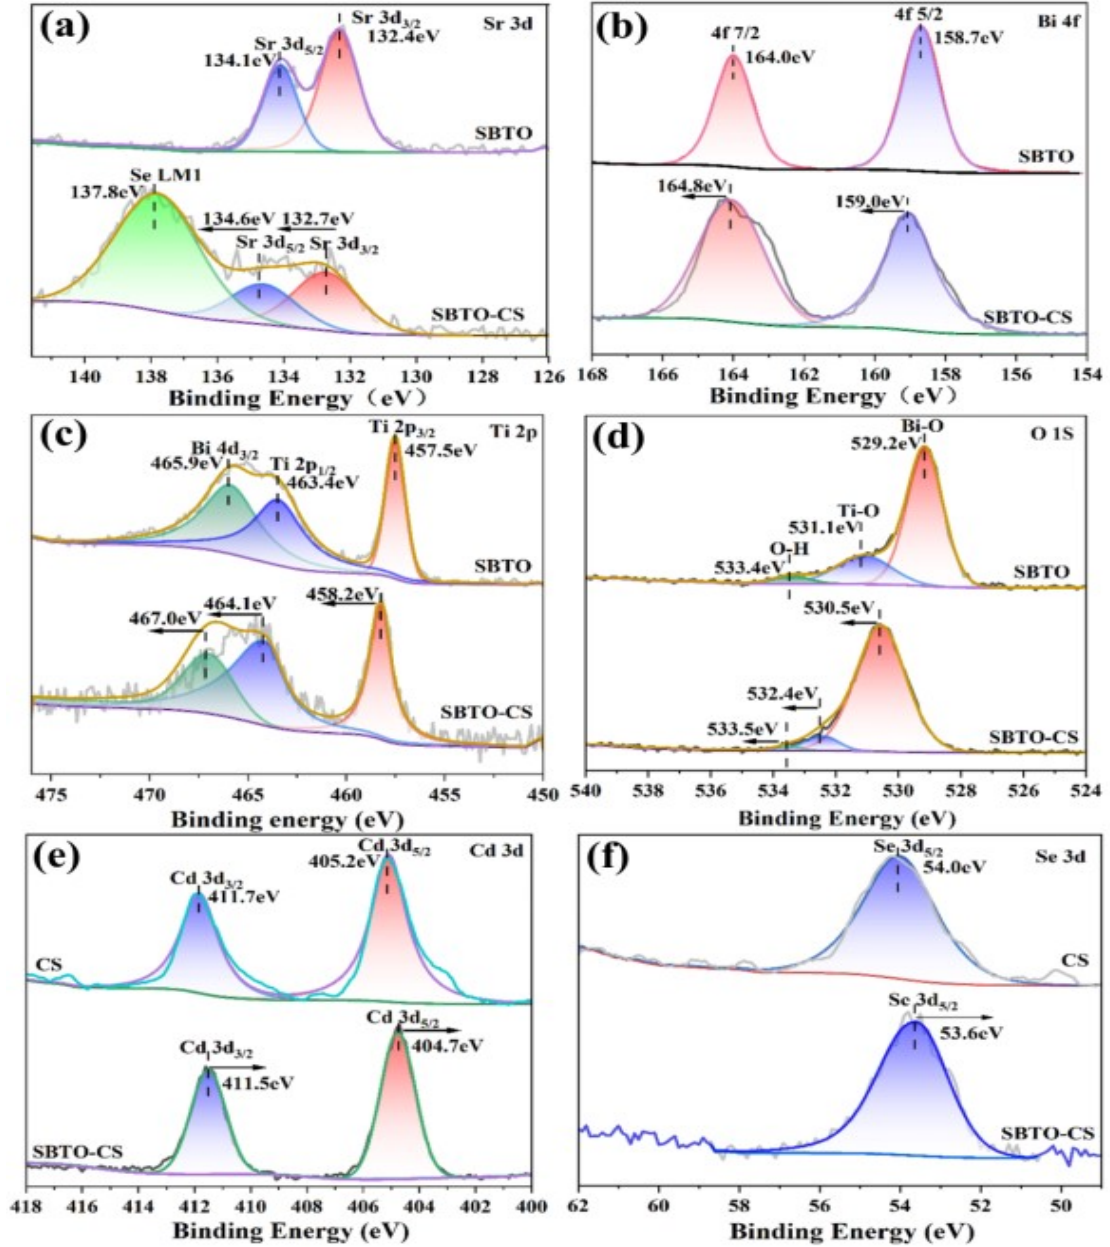

60

61 Fig. S6 XPS patterns of (a) Sr, (b) Bi, (c) Ti, (d) O, (e) Cd, and (f) Se  
 62 elements collected from the pure SBTO, CS and SBTO-CS-15 samples  
 63 (before reactions). The names of the samples are marked on these curves.

64

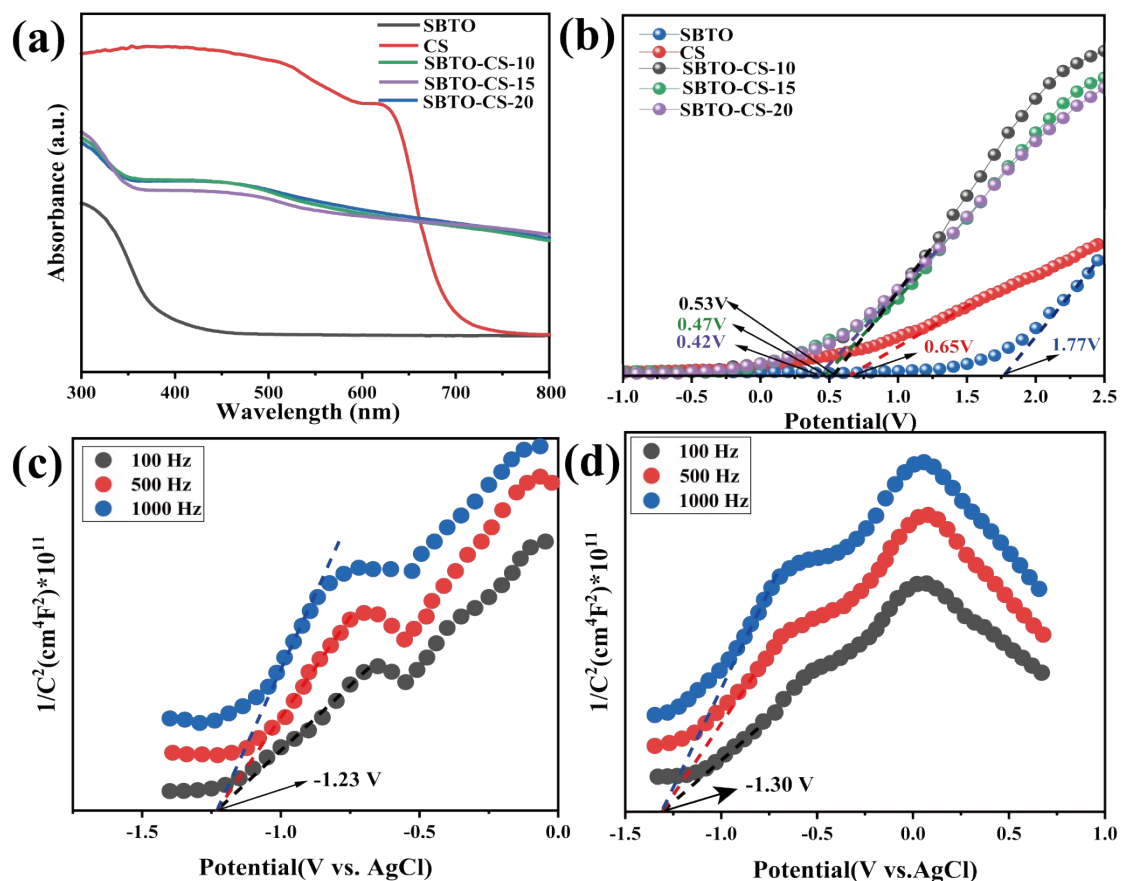

65

66 Fig. S7 (a) the UV-Vis absorption spectra, (b) VB-XPS diagrams for  
 67 SBTO, CS, SBTO-CS-10, 15, 20. (c-d) Mott Schottky curves of (c) SBTO-  
 68 CS-10 and (d) SBTO-CS-20.

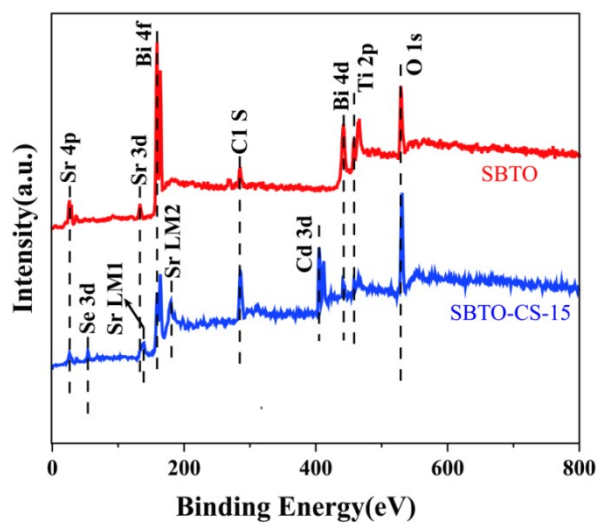

69

70 Fig. S8 XPS spectra of two materials.

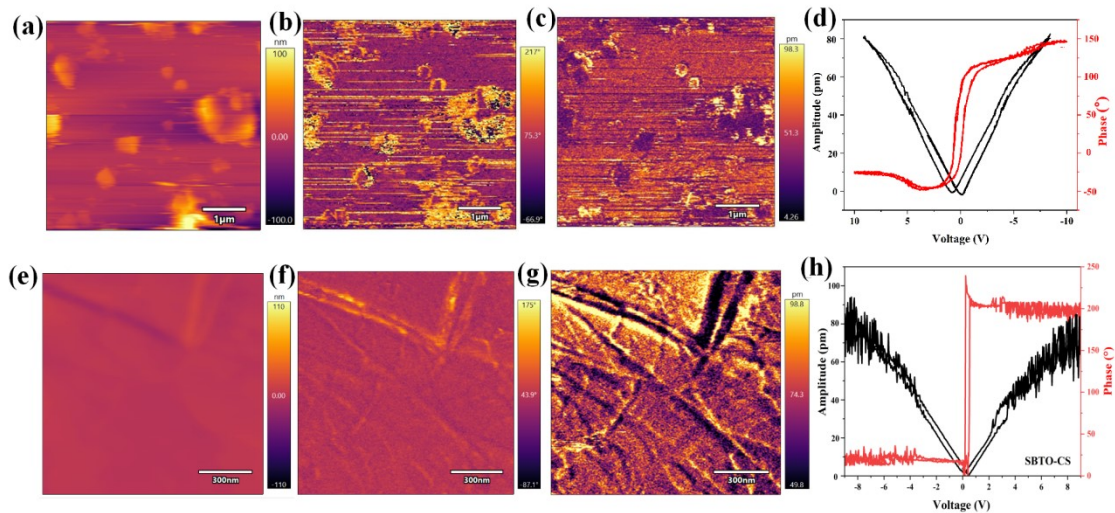

71

72 Fig. S9 PFM images of (a–d) pristine SBTO and (e–h) SBTO-CS: (a, e)  
 73 topography image; (b, f) phase image; (c, g) amplitude image and (d, f)  
 74 amplitude butterfly loops (black) and phase hysteresis loops (red).

75

76

77

78

## References

79

80 [1] D. Zhong, W. Liu, P. Tan, A. Zhu, L. Qiao, Y. Bian, J. Pan, Efficient hydrogen generation of indium  
 81 doped BaTiO<sub>3</sub> decorated with CdSe quantum dots: Novel understanding of the effect of doping  
 82 strategy, International Journal of Hydrogen Energy 44(3) (2019) 1627-1639.  
 83 <https://doi.org/10.1016/j.ijhydene.2018.11.113>

84 [2] X. Li, B. Kang, F. Dong, Z. Zhang, X. Luo, L. Han, J. Huang, Z. Feng, Z. Chen, J. Xu, B. Peng, Z.L.  
 85 Wang, Enhanced photocatalytic degradation and H<sub>2</sub>/H<sub>2</sub>O<sub>2</sub> production performance of S-pCN/WO<sub>2</sub>.72  
 86 S-scheme heterojunction with appropriate surface oxygen vacancies, Nano Energy 81 (2021).  
 87 <https://doi.org/10.1016/j.nanoen.2020.105671>

88

89
